# Supplementary material for: Association between MANBA Gene Variants and Chronic Kidney Disease in a Korean Population
Source: MDPI journal article supplement (doi:10.3390/jcm10112255), 2021-05-23
Supplement: s1 [file s1]

## Supplementary

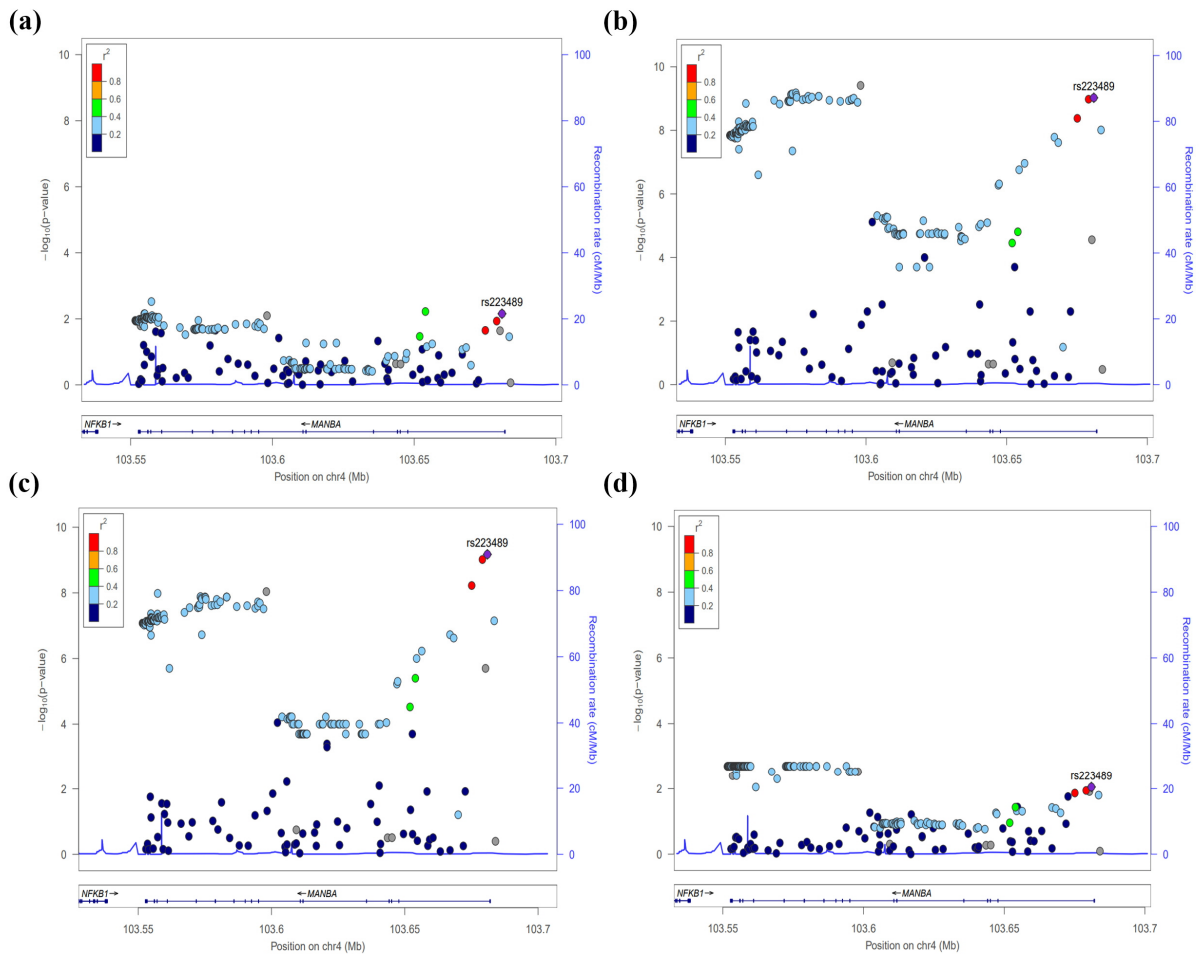

**Figure S1.** Regional plots of the association results of MANBA SNPs with CKD (a) and kidney function-related traits such as eGFR (b), creatinine (c), and uric acid levels (d) in the HEXA cohort. The statistical significance ( $-\log_{10} p\text{-value}$ ) of the analyzed SNPs is plotted. The colors indicate the linkage disequilibrium ( $r^2$ ) between rs223489 and the remaining SNPs. The genetic recombination rates are shown on the right y-axis. The plots were generated by the LocusZoom program (<http://csg.sph.umich.edu/locuszoom/> (accessed on 13 April 2021)).
