# Supplementary material for: Association between MANBA Gene Variants and Chronic Kidney Disease in a Korean Population
Source: J Clin Med. 2021 May 23;10(11):2255. doi: 10.3390/jcm10112255 (PMC8196967; doi:10.3390/jcm10112255)
Supplement: Supplementary file 1 [file jcm-10-02255-s001.zip › Supplementary Table S1.xlsx]

## Sheet: Table S1 
	Table S1. Conditional analyses of multiple SNPs at the MANBA locus.
	Phenotype	Conditioning SNPs	Most significant SNPs	SNP p-value in conditioning model
	CKD	-	rs4496586	2.61 × 10-3
		rs4496586	-	-
	eGFR	-	rs34768739	3.86 × 10-10
		rs34768739	rs78905355	2.74 × 10-3
		rs34768739-rs78905355	rs223489	0.014
		rs34768739-rs78905355-rs223489	-	-
	Creatinine	-	rs223489	6.72 × 10-10
		rs223489	rs78905355	4.38 × 10-3
		rs223489-rs78905355	rs4496586	6.88 × 10-3
		rs223489-rs78905355-rs4496586	-	-
	Uric acid	-	rs4496586	1.83 × 10-3
		rs4496586	-	-
	Conditional analyses were performed to identify secondary association signals. The most significant SNP achieving at p-value < 0.05 was added into the conditional model until no further SNPs were identified. SNP, single nucleotide polymorphism; CKD, chronic kidney disease; eGFR, estimated glomerular filtration rate.
