# Supplementary material for: Association between MANBA Gene Variants and Chronic Kidney Disease in a Korean Population
Source: J Clin Med. 2021 May 23;10(11):2255. doi: 10.3390/jcm10112255 (PMC8196967; doi:10.3390/jcm10112255)
Supplement: Supplementary file 1 [file jcm-10-02255-s001.zip › Supplementary Table S2.xlsx]

## Sheet: Table S2
	Table S2. Results of an association analysis of the SNPs in the MANBA gene with chronic kidney disease and kidney function-related traits.
	No.	SNP	Minor allele	MAF	Function	CKD			eGFR			BUN			Creatinine			Uric acid
						OR (95%CI)	p-value		β ± S.E	p-value		β ± S.E	p-value		β ± S.E	p-value		β ± S.E	p-value
	1	rs4496586	C	0.4878	Intron	0.87 (0.80-0.95)	2.61 × 10-3		0.565 ± 0.093	1.43 × 10-9		-0.032 ± 0.021	0.1211		-0.0042 ± 0.00073	1.04 × 10-8		-0.019 ± 0.006	1.83 × 10-3
	2	rs1480005717	G	0.4499	Intron	0.88 (0.80-0.96)	3.79 × 10-3		0.467 ± 0.094	7.20 × 10-7		-0.014 ± 0.021	0.5009		-0.0039 ± 0.00073	1.04 × 10-7		-0.013 ± 0.006	0.02897
	3	rs1192229674	A	0.08682	Intron	0.78 (0.66-0.93)	4.22 × 10-3		0.294 ± 0.166	0.07581		-0.012 ± 0.037	0.7549		-0.0027 ± 0.00129	0.03413		-0.012 ± 0.011	0.2797
	4	rs223497	C	0.4497	Intron	0.88 (0.81-0.97)	6.10 × 10-3		0.406 ± 0.094	1.55 × 10-5		-0.018 ± 0.021	0.3986		-0.0034 ± 0.00073	3.91 × 10-6		-0.013 ± 0.006	0.03721
	5	rs5026472	G	0.4739	Intron	0.89 (0.81-0.97)	6.94 × 10-3		0.545 ± 0.093	5.34 × 10-9		-0.031 ± 0.021	0.1395		-0.0040 ± 0.00073	4.33 × 10-8		-0.018 ± 0.006	3.29 × 10-3
	6	rs223489*	G	0.3567	Intron	0.88 (0.80-0.97)	7.08 × 10-3		0.599 ± 0.098	9.42 × 10-10		-0.029 ± 0.022	0.1857		-0.0047 ± 0.00076	6.72 × 10-10		-0.017 ± 0.006	8.61 × 10-3
	7	rs13106304	G	0.4731	Intron	0.89 (0.81-0.97)	7.39 × 10-3		0.534 ± 0.093	1.08 × 10-8		-0.033 ± 0.021	0.1154		-0.0040 ± 0.00073	5.85 × 10-8		-0.019 ± 0.006	2.03 × 10-3
	8	rs34768739	GA	0.4552	Intron	0.89 (0.81-0.97)	7.65 × 10-3		0.586 ± 0.094	3.86 × 10-10		-0.028 ± 0.021	0.1812		-0.0042 ± 0.00073	9.15 × 10-9		-0.018 ± 0.006	3.18 × 10-3
	9	rs9996834	G	0.4711	Intron	0.89 (0.81-0.97)	8.17 × 10-3		0.541 ± 0.093	7.03 × 10-9		-0.032 ± 0.021	0.1225		-0.0040 ± 0.00073	5.53 × 10-8		-0.019 ± 0.006	2.22 × 10-3
	10	rs909349	C	0.4708	Intron	0.89 (0.82-0.97)	9.02 × 10-3		0.540 ± 0.093	7.51 × 10-9		-0.033 ± 0.021	0.112		-0.0040 ± 0.00073	5.67 × 10-8		-0.019 ± 0.006	2.03 × 10-3
	11	rs4586937	C	0.4708	Intron	0.89 (0.82-0.97)	9.02 × 10-3		0.540 ± 0.093	7.51 × 10-9		-0.033 ± 0.021	0.112		-0.0040 ± 0.00073	5.67 × 10-8		-0.019 ± 0.006	2.03 × 10-3
	12	rs4547797	T	0.4708	Intron	0.89 (0.82-0.97)	9.02 × 10-3		0.540 ± 0.093	7.51 × 10-9		-0.033 ± 0.021	0.112		-0.0040 ± 0.00073	5.67 × 10-8		-0.019 ± 0.006	2.03 × 10-3
	13	rs2866414	T	0.4708	Intron	0.89 (0.82-0.97)	9.02 × 10-3		0.540 ± 0.093	7.51 × 10-9		-0.033 ± 0.021	0.112		-0.0040 ± 0.00073	5.67 × 10-8		-0.019 ± 0.006	2.03 × 10-3
	14	rs11727546	G	0.4708	Intron	0.89 (0.82-0.97)	9.02 × 10-3		0.540 ± 0.093	7.51 × 10-9		-0.033 ± 0.021	0.112		-0.0040 ± 0.00073	5.67 × 10-8		-0.019 ± 0.006	2.03 × 10-3
	15	rs2903283	C	0.4708	Intron	0.89 (0.82-0.97)	9.02 × 10-3		0.540 ± 0.093	7.51 × 10-9		-0.033 ± 0.021	0.112		-0.0040 ± 0.00073	5.67 × 10-8		-0.019 ± 0.006	2.03 × 10-3
	16	rs5026473	G	0.4716	Intron	0.89 (0.82-0.97)	9.05 × 10-3		0.538 ± 0.093	8.46 × 10-9		-0.034 ± 0.021	0.1044		-0.0040 ± 0.00073	5.69 × 10-8		-0.019 ± 0.006	1.94 × 10-3
	17	rs5026474	A	0.4716	Intron	0.89 (0.82-0.97)	9.05 × 10-3		0.538 ± 0.093	8.46 × 10-9		-0.034 ± 0.021	0.1044		-0.0040 ± 0.00073	5.69 × 10-8		-0.019 ± 0.006	1.94 × 10-3
	18	rs4579121	G	0.4708	Intron	0.89 (0.82-0.97)	9.05 × 10-3		0.540 ± 0.093	7.58 × 10-9		-0.033 ± 0.021	0.1114		-0.0040 ± 0.00073	5.76 × 10-8		-0.019 ± 0.006	1.96 × 10-3
	19	rs6533020	C	0.4708	Intron	0.89 (0.82-0.97)	9.05 × 10-3		0.540 ± 0.093	7.58 × 10-9		-0.033 ± 0.021	0.1114		-0.0040 ± 0.00073	5.76 × 10-8		-0.019 ± 0.006	1.96 × 10-3
	20	rs6533021	G	0.4708	Intron	0.89 (0.82-0.97)	9.05 × 10-3		0.540 ± 0.093	7.58 × 10-9		-0.033 ± 0.021	0.1114		-0.0040 ± 0.00073	5.76 × 10-8		-0.019 ± 0.006	1.96 × 10-3
	21	rs6533022	C	0.4708	Intron	0.89 (0.82-0.97)	9.05 × 10-3		0.540 ± 0.093	7.58 × 10-9		-0.033 ± 0.021	0.1114		-0.0040 ± 0.00073	5.76 × 10-8		-0.019 ± 0.006	1.96 × 10-3
	22	rs35112949	T	0.4708	Intron	0.89 (0.82-0.97)	9.05 × 10-3		0.540 ± 0.093	7.58 × 10-9		-0.033 ± 0.021	0.1114		-0.0040 ± 0.00073	5.76 × 10-8		-0.019 ± 0.006	1.96 × 10-3
	23	rs3733202	C	0.4707	Intron	0.89 (0.82-0.97)	9.23 × 10-3		0.540 ± 0.093	7.86 × 10-9		-0.033 ± 0.021	0.1137		-0.0039 ± 0.00073	6.01 × 10-8		-0.019 ± 0.006	2.02 × 10-3
	24	rs2125211	G	0.4707	Intron	0.89 (0.82-0.97)	9.30 × 10-3		0.540 ± 0.093	7.49 × 10-9		-0.034 ± 0.021	0.1086		-0.0039 ± 0.00073	6.42 × 10-8		-0.019 ± 0.006	2.09 × 10-3
	25	rs6812747	C	0.4714	Intron	0.89 (0.82-0.97)	9.30 × 10-3		0.535 ± 0.093	1.01 × 10-8		-0.034 ± 0.021	0.1039		-0.0039 ± 0.00073	6.71 × 10-8		-0.019 ± 0.006	2.05 × 10-3
	26	rs6813322	G	0.4714	Intron	0.89 (0.82-0.97)	9.30 × 10-3		0.535 ± 0.093	1.01 × 10-8		-0.034 ± 0.021	0.1039		-0.0039 ± 0.00073	6.71 × 10-8		-0.019 ± 0.006	2.05 × 10-3
	27	rs6839064	C	0.4714	Intron	0.89 (0.82-0.97)	9.30 × 10-3		0.535 ± 0.093	1.01 × 10-8		-0.034 ± 0.021	0.1039		-0.0039 ± 0.00073	6.71 × 10-8		-0.019 ± 0.006	2.05 × 10-3
	28	rs2272695	C	0.4714	Intron	0.89 (0.82-0.97)	9.30 × 10-3		0.535 ± 0.093	1.01 × 10-8		-0.034 ± 0.021	0.1039		-0.0039 ± 0.00073	6.71 × 10-8		-0.019 ± 0.006	2.05 × 10-3
	29	rs2272696	A	0.4714	Intron	0.89 (0.82-0.97)	9.30 × 10-3		0.535 ± 0.093	1.01 × 10-8		-0.034 ± 0.021	0.1039		-0.0039 ± 0.00073	6.71 × 10-8		-0.019 ± 0.006	2.05 × 10-3
	30	rs2272697	G	0.4714	Synonymous	0.89 (0.82-0.97)	9.30 × 10-3		0.535 ± 0.093	1.01 × 10-8		-0.034 ± 0.021	0.1039		-0.0039 ± 0.00073	6.71 × 10-8		-0.019 ± 0.006	2.05 × 10-3
	31	rs5026476	C	0.4714	Intron	0.89 (0.82-0.97)	9.30 × 10-3		0.535 ± 0.093	1.05 × 10-8		-0.034 ± 0.021	0.1056		-0.0039 ± 0.00073	6.87 × 10-8		-0.019 ± 0.006	2.07 × 10-3
	32	rs13106325	G	0.4714	Intron	0.89 (0.82-0.97)	9.30 × 10-3		0.535 ± 0.093	1.05 × 10-8		-0.034 ± 0.021	0.1056		-0.0039 ± 0.00073	6.87 × 10-8		-0.019 ± 0.006	2.07 × 10-3
	33	rs34642884	GC	0.4714	Intron	0.89 (0.82-0.97)	9.30 × 10-3		0.535 ± 0.093	1.05 × 10-8		-0.034 ± 0.021	0.1056		-0.0039 ± 0.00073	6.87 × 10-8		-0.019 ± 0.006	2.07 × 10-3
	34	rs6813157	C	0.4714	Intron	0.89 (0.82-0.97)	9.32 × 10-3		0.534 ± 0.093	1.11 × 10-8		-0.034 ± 0.021	0.1059		-0.0039 ± 0.00073	7.09 × 10-8		-0.019 ± 0.006	1.97 × 10-3
	35	rs6813687	A	0.4714	Intron	0.89 (0.82-0.97)	9.32 × 10-3		0.534 ± 0.093	1.11 × 10-8		-0.034 ± 0.021	0.1059		-0.0039 ± 0.00073	7.09 × 10-8		-0.019 ± 0.006	1.97 × 10-3
	36	rs10027437	A	0.4712	Intron	0.89 (0.82-0.97)	9.98 × 10-3		0.543 ± 0.093	6.42 × 10-9		-0.034 ± 0.021	0.1006		-0.0040 ± 0.00073	4.42 × 10-8		-0.019 ± 0.006	1.87 × 10-3
	37	rs5026469	A	0.472	Intron	0.89 (0.82-0.97)	9.98 × 10-3		0.532 ± 0.093	1.26 × 10-8		-0.034 ± 0.021	0.1063		-0.0039 ± 0.00073	7.00 × 10-8		-0.019 ± 0.006	2.02 × 10-3
	38	rs5026470	G	0.472	Intron	0.89 (0.82-0.97)	9.98 × 10-3		0.532 ± 0.093	1.26 × 10-8		-0.034 ± 0.021	0.1063		-0.0039 ± 0.00073	7.00 × 10-8		-0.019 ± 0.006	2.02 × 10-3
	39	rs5026471	A	0.472	Intron	0.89 (0.82-0.97)	9.98 × 10-3		0.532 ± 0.093	1.26 × 10-8		-0.034 ± 0.021	0.1063		-0.0039 ± 0.00073	7.00 × 10-8		-0.019 ± 0.006	2.02 × 10-3
	40	rs6810869	A	0.4708	Intron	0.89 (0.82-0.97)	0.01013		0.540 ± 0.093	7.81 × 10-9		-0.033 ± 0.021	0.1143		-0.0040 ± 0.00073	5.26 × 10-8		-0.019 ± 0.006	1.98 × 10-3
	41	rs12498722	T	0.4711	Intron	0.89 (0.82-0.97)	0.01021		0.532 ± 0.093	1.29 × 10-8		-0.034 ± 0.021	0.1062		-0.0039 ± 0.00073	8.17 × 10-8		-0.019 ± 0.006	2.09 × 10-3
	42	rs2866413	A	0.47	Missense	0.89 (0.82-0.97)	0.01031		0.536 ± 0.093	9.66 × 10-9		-0.032 ± 0.021	0.1289		-0.0039 ± 0.00073	7.25 × 10-8		-0.019 ± 0.006	2.23 × 10-3
	43	rs6821119	C	0.472	Intron	0.89 (0.82-0.97)	0.01034		0.539 ± 0.093	8.30 × 10-9		-0.034 ± 0.021	0.09841		-0.0039 ± 0.00073	5.91 × 10-8		-0.019 ± 0.006	2.22 × 10-3
	44	rs6844332	A	0.472	Intron	0.89 (0.82-0.97)	0.01034		0.539 ± 0.093	8.30 × 10-9		-0.034 ± 0.021	0.09841		-0.0039 ± 0.00073	5.91 × 10-8		-0.019 ± 0.006	2.22 × 10-3
	45	rs6821133	C	0.472	Intron	0.89 (0.82-0.97)	0.01034		0.539 ± 0.093	8.30 × 10-9		-0.034 ± 0.021	0.09841		-0.0039 ± 0.00073	5.91 × 10-8		-0.019 ± 0.006	2.22 × 10-3
	46	rs1054029	A	0.4716	Intron	0.89 (0.82-0.97)	0.01043		0.532 ± 0.093	1.23 × 10-8		-0.035 ± 0.021	0.0978		-0.0039 ± 0.00073	7.39 × 10-8		-0.019 ± 0.006	2.40 × 10-3
	47	rs3194585	G	0.4716	Intron	0.89 (0.82-0.97)	0.01043		0.532 ± 0.093	1.23 × 10-8		-0.035 ± 0.021	0.0978		-0.0039 ± 0.00073	7.39 × 10-8		-0.019 ± 0.006	2.40 × 10-3
	48	rs735403	T	0.4716	Intron	0.89 (0.82-0.97)	0.01043		0.532 ± 0.093	1.23 × 10-8		-0.035 ± 0.021	0.0978		-0.0039 ± 0.00073	7.39 × 10-8		-0.019 ± 0.006	2.40 × 10-3
	49	rs735404	A	0.4716	Intron	0.89 (0.82-0.97)	0.01043		0.532 ± 0.093	1.23 × 10-8		-0.035 ± 0.021	0.0978		-0.0039 ± 0.00073	7.39 × 10-8		-0.019 ± 0.006	2.40 × 10-3
	50	rs2866406	A	0.4716	Intron	0.89 (0.82-0.97)	0.01047		0.534 ± 0.093	1.12 × 10-8		-0.034 ± 0.021	0.09854		-0.0039 ± 0.00073	7.18 × 10-8		-0.019 ± 0.006	2.37 × 10-3
	51	rs735405	C	0.4716	Intron	0.89 (0.82-0.97)	0.01053		0.533 ± 0.093	1.23 × 10-8		-0.034 ± 0.021	0.09956		-0.0039 ± 0.00073	7.50 × 10-8		-0.019 ± 0.006	2.37 × 10-3
	52	rs1077358	T	0.4716	Intron	0.89 (0.82-0.97)	0.01053		0.533 ± 0.093	1.23 × 10-8		-0.034 ± 0.021	0.09956		-0.0039 ± 0.00073	7.50 × 10-8		-0.019 ± 0.006	2.37 × 10-3
	53	rs228631	C	0.4917	Intron	0.89 (0.82-0.97)	0.01111		0.511 ± 0.093	4.44 × 10-8		-0.025 ± 0.021	0.2284		-0.0038 ± 0.00073	1.89 × 10-7		-0.019 ± 0.006	2.27 × 10-3
	54	rs7665090	G	0.4719	Intron	0.89 (0.82-0.97)	0.01122		0.530 ± 0.093	1.45 × 10-8		-0.035 ± 0.021	0.09101		-0.0039 ± 0.00073	8.38 × 10-8		-0.019 ± 0.006	2.40 × 10-3
	55	rs13112561	G	0.4719	Intron	0.89 (0.82-0.98)	0.01154		0.528 ± 0.093	1.59 × 10-8		-0.034 ± 0.021	0.1004		-0.0039 ± 0.00073	9.54 × 10-8		-0.019 ± 0.006	2.39 × 10-3
	56	rs7690123	C	0.4718	Intron	0.89 (0.82-0.98)	0.01159		0.530 ± 0.093	1.41 × 10-8		-0.034 ± 0.021	0.0996		-0.0039 ± 0.00073	8.63 × 10-8		-0.019 ± 0.006	2.36 × 10-3
	57	rs7665659	T	0.4718	Intron	0.89 (0.82-0.98)	0.01159		0.530 ± 0.093	1.41 × 10-8		-0.034 ± 0.021	0.0996		-0.0039 ± 0.00073	8.63 × 10-8		-0.019 ± 0.006	2.36 × 10-3
	58	rs7665854	A	0.4718	Intron	0.89 (0.82-0.98)	0.01159		0.530 ± 0.093	1.41 × 10-8		-0.034 ± 0.021	0.0996		-0.0039 ± 0.00073	8.63 × 10-8		-0.019 ± 0.006	2.36 × 10-3
	59	rs7690700	C	0.4718	Intron	0.89 (0.82-0.98)	0.01159		0.530 ± 0.093	1.41 × 10-8		-0.034 ± 0.021	0.0996		-0.0039 ± 0.00073	8.63 × 10-8		-0.019 ± 0.006	2.36 × 10-3
	60	rs13112557	C	0.4718	Intron	0.89 (0.82-0.98)	0.01159		0.530 ± 0.093	1.41 × 10-8		-0.034 ± 0.021	0.0996		-0.0039 ± 0.00073	8.63 × 10-8		-0.019 ± 0.006	2.36 × 10-3
	61	rs12644381	G	0.4718	Intron	0.89 (0.82-0.98)	0.01159		0.530 ± 0.093	1.41 × 10-8		-0.034 ± 0.021	0.0996		-0.0039 ± 0.00073	8.63 × 10-8		-0.019 ± 0.006	2.36 × 10-3
	62	rs1054037	T	0.4718	Intron	0.89 (0.82-0.98)	0.01159		0.530 ± 0.093	1.41 × 10-8		-0.034 ± 0.021	0.0996		-0.0039 ± 0.00073	8.63 × 10-8		-0.019 ± 0.006	2.36 × 10-3
	63	rs4013	T	0.4718	Intron	0.89 (0.82-0.98)	0.01159		0.529 ± 0.093	1.52 × 10-8		-0.034 ± 0.021	0.1004		-0.0039 ± 0.00073	9.02 × 10-8		-0.019 ± 0.006	2.34 × 10-3
	64	rs4019	A	0.4718	Intron	0.89 (0.82-0.98)	0.01159		0.529 ± 0.093	1.52 × 10-8		-0.034 ± 0.021	0.1004		-0.0039 ± 0.00073	9.02 × 10-8		-0.019 ± 0.006	2.34 × 10-3
	65	rs223490	T	0.3559	Intron	0.89 (0.81-0.97)	0.01168		0.597 ± 0.098	1.05 × 10-9		-0.024 ± 0.022	0.2631		-0.0047 ± 0.00076	9.65 × 10-10		-0.016 ± 0.006	0.01147
	66	rs2866408	A	0.4714	Intron	0.89 (0.82-0.98)	0.01178		0.536 ± 0.093	1.01 × 10-8		-0.034 ± 0.021	0.09882		-0.0039 ± 0.00073	7.46 × 10-8		-0.019 ± 0.006	1.85 × 10-3
	67	rs2866407	G	0.4714	Intron	0.89 (0.82-0.98)	0.01178		0.535 ± 0.093	1.03 × 10-8		-0.034 ± 0.021	0.1001		-0.0039 ± 0.00073	7.55 × 10-8		-0.019 ± 0.006	1.85 × 10-3
	68	rs2866409	G	0.4713	Intron	0.89 (0.82-0.98)	0.01248		0.531 ± 0.093	1.32 × 10-8		-0.034 ± 0.021	0.1041		-0.0039 ± 0.00073	9.61 × 10-8		-0.019 ± 0.006	1.81 × 10-3
	69	rs34349956	T	0.4655	Intron	0.89 (0.82-0.98)	0.01285		0.546 ± 0.094	5.44 × 10-9		-0.036 ± 0.021	0.08274		-0.0040 ± 0.00073	4.62 × 10-8		-0.019 ± 0.006	2.39 × 10-3
	70	rs227276	T	0.453	Intron	0.90 (0.82-0.98)	0.01313		0.571 ± 0.094	1.09 × 10-9		-0.027 ± 0.021	0.1934		-0.0041 ± 0.00073	1.89 × 10-8		-0.018 ± 0.006	2.56 × 10-3
	71	rs6847587*	G	0.4553	Intron	0.90 (0.82-0.98)	0.01422		0.569 ± 0.094	1.22 × 10-9		-0.026 ± 0.021	0.2164		-0.0041 ± 0.00073	2.46 × 10-8		-0.018 ± 0.006	3.13 × 10-3
	72	rs227278	A	0.4515	Intron	0.90 (0.82-0.98)	0.01436		0.573 ± 0.094	9.73 × 10-10		-0.027 ± 0.021	0.1899		-0.0041 ± 0.00073	2.05 × 10-8		-0.018 ± 0.006	2.61 × 10-3
	73	rs227361*	C	0.4514	Intron	0.90 (0.82-0.98)	0.01468		0.571 ± 0.094	1.13 × 10-9		-0.028 ± 0.021	0.1789		-0.0041 ± 0.00073	2.62 × 10-8		-0.019 ± 0.006	2.15 × 10-3
	74	rs2866410	A	0.4709	Intron	0.90 (0.82-0.98)	0.01518		0.528 ± 0.093	1.60 × 10-8		-0.033 ± 0.021	0.1152		-0.0039 ± 0.00073	1.11 × 10-7		-0.019 ± 0.006	1.63 × 10-3
	75	rs2866411	T	0.4709	Intron	0.90 (0.82-0.98)	0.01518		0.528 ± 0.093	1.60 × 10-8		-0.033 ± 0.021	0.1152		-0.0039 ± 0.00073	1.11 × 10-7		-0.019 ± 0.006	1.63 × 10-3
	76	rs2866412	A	0.4708	Intron	0.90 (0.82-0.98)	0.01544		0.527 ± 0.093	1.75 × 10-8		-0.033 ± 0.021	0.1129		-0.0039 ± 0.00073	1.11 × 10-7		-0.019 ± 0.006	1.66 × 10-3
	77	rs228611*	G	0.4676	Intron	0.90 (0.82-0.98)	0.01603		0.483 ± 0.094	2.51 × 10-7		-0.030 ± 0.021	0.1561		-0.0035 ± 0.00073	1.85 × 10-6		-0.016 ± 0.006	9.43 × 10-3
	78	rs5860729	GA	0.4704	Intron	0.90 (0.82-0.98)	0.01614		0.527 ± 0.094	1.75 × 10-8		-0.037 ± 0.021	0.07762		-0.0039 ± 0.00073	9.72 × 10-8		-0.018 ± 0.006	4.09 × 10-3
	79	rs227275	A	0.4507	Intron	0.90 (0.82-0.98)	0.01652		0.570 ± 0.094	1.16 × 10-9		-0.030 ± 0.021	0.1537		-0.0041 ± 0.00073	2.95 × 10-8		-0.019 ± 0.006	2.48 × 10-3
	80	rs5026475	T	0.4749	Intron	1.11 (1.02-1.21)	0.01735		-0.512 ± 0.093	3.92 × 10-8		-0.031 ± 0.021	0.1312		-0.0038 ± 0.00073	1.96 × 10-7		-0.018 ± 0.006	4.03 × 10-3
	81	rs227277	G	0.4508	Intron	0.90 (0.82-0.98)	0.01746		0.572 ± 0.094	1.04 × 10-9		-0.029 ± 0.021	0.1593		-0.0041 ± 0.00073	2.51 × 10-8		-0.018 ± 0.006	2.77 × 10-3
	82	rs228618	G	0.4893	Intron	0.90 (0.83-0.98)	0.01832		0.567 ± 0.093	1.13 × 10-9		-0.029 ± 0.021	0.1594		-0.0040 ± 0.00073	3.95 × 10-8		-0.018 ± 0.006	2.63 × 10-3
	83	rs228617	T	0.4493	Intron	0.90 (0.82-0.98)	0.01872		0.574 ± 0.094	9.03 × 10-10		-0.029 ± 0.021	0.1599		-0.0041 ± 0.00073	1.87 × 10-8		-0.019 ± 0.006	2.13 × 10-3
	84	rs228630	G	0.4497	Intron	0.90 (0.83-0.98)	0.01959		0.578 ± 0.094	7.16 × 10-10		-0.029 ± 0.021	0.17		-0.0041 ± 0.00073	1.45 × 10-8		-0.019 ± 0.006	1.90 × 10-3
	85	rs179195	C	0.4496	Intron	0.90 (0.83-0.98)	0.01964		0.579 ± 0.094	6.59 × 10-10		-0.029 ± 0.021	0.1674		-0.0042 ± 0.00073	1.33 × 10-8		-0.019 ± 0.006	1.82 × 10-3
	86	rs228632	C	0.4497	Intron	0.90 (0.83-0.98)	0.01981		0.578 ± 0.094	7.08 × 10-10		-0.029 ± 0.021	0.1634		-0.0041 ± 0.00073	1.57 × 10-8		-0.019 ± 0.006	1.80 × 10-3
	87	rs227279	A	0.4504	Intron	0.90 (0.83-0.98)	0.01996		0.569 ± 0.094	1.31 × 10-9		-0.029 ± 0.021	0.1586		-0.0040 ± 0.00073	3.07 × 10-8		-0.018 ± 0.006	2.57 × 10-3
	88	rs228626	C	0.4502	Intron	0.90 (0.83-0.98)	0.02006		0.569 ± 0.094	1.25 × 10-9		-0.030 ± 0.021	0.1526		-0.0041 ± 0.00073	2.75 × 10-8		-0.019 ± 0.006	2.06 × 10-3
	89	rs2978641	T	0.4495	Intron	0.90 (0.83-0.98)	0.02017		0.576 ± 0.094	7.91 × 10-10		-0.028 ± 0.021	0.1745		-0.0041 ± 0.00073	1.40 × 10-8		-0.019 ± 0.006	2.34 × 10-3
	90	rs228616	G	0.4494	Intron	0.90 (0.83-0.98)	0.02037		0.572 ± 0.094	1.06 × 10-9		-0.030 ± 0.021	0.1572		-0.0041 ± 0.00073	2.30 × 10-8		-0.019 ± 0.006	2.38 × 10-3
	91	rs228612	C	0.4495	Intron	0.90 (0.83-0.98)	0.02038		0.574 ± 0.094	9.09 × 10-10		-0.028 ± 0.021	0.175		-0.0041 ± 0.00073	1.58 × 10-8		-0.019 ± 0.006	2.41 × 10-3
	92	rs228629	G	0.4499	Intron	0.90 (0.83-0.98)	0.02051		0.577 ± 0.094	7.37 × 10-10		-0.029 ± 0.021	0.163		-0.0042 ± 0.00073	1.30 × 10-8		-0.019 ± 0.006	2.11 × 10-3
	93	rs228623	G	0.4501	Intron	0.90 (0.83-0.98)	0.02057		0.570 ± 0.094	1.19 × 10-9		-0.029 ± 0.021	0.16		-0.0041 ± 0.00073	2.75 × 10-8		-0.019 ± 0.006	2.00 × 10-3
	94	rs228624	G	0.4501	Intron	0.90 (0.83-0.98)	0.02058		0.570 ± 0.094	1.24 × 10-9		-0.029 ± 0.021	0.1603		-0.0041 ± 0.00073	2.84 × 10-8		-0.019 ± 0.006	2.07 × 10-3
	95	rs228628	C	0.4499	Intron	0.90 (0.83-0.98)	0.02063		0.577 ± 0.094	7.50 × 10-10		-0.029 ± 0.021	0.1652		-0.0042 ± 0.00073	1.33 × 10-8		-0.019 ± 0.006	2.09 × 10-3
	96	rs434644	A	0.4493	Intron	0.90 (0.83-0.98)	0.02078		0.575 ± 0.094	8.48 × 10-10		-0.029 ± 0.021	0.1594		-0.0042 ± 0.00073	1.34 × 10-8		-0.019 ± 0.006	2.49 × 10-3
	97	rs413967	G	0.4493	Intron	0.90 (0.83-0.98)	0.02078		0.575 ± 0.094	8.48 × 10-10		-0.029 ± 0.021	0.1594		-0.0042 ± 0.00073	1.34 × 10-8		-0.019 ± 0.006	2.49 × 10-3
	98	rs404574	A	0.4493	Intron	0.90 (0.83-0.98)	0.02078		0.575 ± 0.094	8.48 × 10-10		-0.029 ± 0.021	0.1594		-0.0042 ± 0.00073	1.34 × 10-8		-0.019 ± 0.006	2.49 × 10-3
	99	rs958459177	C	0.4558	Intron	0.90 (0.83-0.98)	0.02079		0.546 ± 0.094	5.88 × 10-9		-0.026 ± 0.021	0.2133		-0.0040 ± 0.00073	5.72 × 10-8		-0.018 ± 0.006	3.51 × 10-3
	100	rs228614	G	0.4493	Intron	0.90 (0.83-0.98)	0.02085		0.573 ± 0.094	1.00 × 10-9		-0.029 ± 0.021	0.1731		-0.0041 ± 0.00073	2.32 × 10-8		-0.019 ± 0.006	2.22 × 10-3
	101	rs228627	C	0.4503	Intron	0.90 (0.83-0.98)	0.02116		0.570 ± 0.094	1.22 × 10-9		-0.029 ± 0.021	0.1612		-0.0041 ± 0.00073	2.27 × 10-8		-0.019 ± 0.006	2.34 × 10-3
	102	rs228613	T	0.4494	Intron	0.90 (0.83-0.98)	0.02129		0.572 ± 0.094	1.08 × 10-9		-0.029 ± 0.021	0.1669		-0.0041 ± 0.00073	2.43 × 10-8		-0.019 ± 0.006	2.45 × 10-3
	103	rs228625	G	0.4503	Intron	0.90 (0.83-0.98)	0.02144		0.570 ± 0.094	1.18 × 10-9		-0.029 ± 0.021	0.1595		-0.0041 ± 0.00073	2.39 × 10-8		-0.019 ± 0.006	2.34 × 10-3
	104	rs228615	A	0.4496	Intron	0.90 (0.83-0.99)	0.02156		0.575 ± 0.094	8.48 × 10-10		-0.029 ± 0.021	0.1663		-0.0041 ± 0.00073	1.59 × 10-8		-0.019 ± 0.006	2.49 × 10-3
	105	rs1323803007	C	0.309	Intron	0.89 (0.81-0.98)	0.02214		0.455 ± 0.101	7.38 × 10-6		-0.041 ± 0.023	0.06778		-0.0035 ± 0.00079	1.12 × 10-5		-0.012 ± 0.007	0.06324
	106	rs147730991	T	0.01431	Intron	1.44 (1.05-1.98)	0.02216		-0.396 ± 0.394	0.3149		0.113 ± 0.088	0.1973		0.0042 ± 0.00307	0.1752		-0.020 ± 0.026	0.4286
	107	rs223492	C	0.3427	Intron	0.90 (0.82-0.98)	0.02237		0.580 ± 0.099	4.18 × 10-9		-0.031 ± 0.022	0.1599		-0.0045 ± 0.00077	5.98 × 10-9		-0.016 ± 0.006	0.01372
	108	rs36126232	CT	0.402	Intron	0.90 (0.82-0.99)	0.02291		0.401 ± 0.096	2.76 × 10-5		-0.028 ± 0.021	0.1849		-0.0036 ± 0.00075	1.92 × 10-6		-0.016 ± 0.006	0.01227
	109	rs6834176	A	0.1014	Intron	0.84 (0.72-0.98)	0.02442		0.317 ± 0.154	0.03936		-0.030 ± 0.034	0.3861		-0.0026 ± 0.00120	0.028		-0.005 ± 0.010	0.6335
	110	rs765789	T	0.1006	Intron	0.84 (0.72-0.98)	0.02699		0.316 ± 0.154	0.04048		-0.023 ± 0.034	0.4959		-0.0026 ± 0.00120	0.02901		-0.004 ± 0.010	0.6795
	111	rs228619	A	0.45	Intron	0.91 (0.83-0.99)	0.02998		0.567 ± 0.094	1.49 × 10-9		-0.030 ± 0.021	0.1558		-0.0041 ± 0.00073	2.83 × 10-8		-0.017 ± 0.006	4.70 × 10-3
	112	rs223498	C	0.4533	Intron	0.91 (0.83-0.99)	0.03403		0.389 ± 0.094	3.49 × 10-5		-0.025 ± 0.021	0.2316		-0.0030 ± 0.00073	3.14 × 10-5		-0.010 ± 0.006	0.1109
	113	rs223487	C	0.2542	Intron	0.90 (0.81-0.99)	0.03483		0.616 ± 0.107	9.73 × 10-9		-0.049 ± 0.024	0.04048		-0.0045 ± 0.00084	7.10 × 10-8		-0.017 ± 0.007	0.01585
	114	rs769489636	G	0.05488	Intron	0.80 (0.66-0.99)	0.0358		0.494 ± 0.205	0.01589		-0.057 ± 0.046	0.21		-0.0045 ± 0.00160	5.29 × 10-3		-0.012 ± 0.013	0.374
	115	rs11097790	C	0.384	Intron	0.91 (0.83-0.99)	0.03808		0.432 ± 0.097	7.66 × 10-6		-0.004 ± 0.022	0.8418		-0.0029 ± 0.00075	9.06 × 10-5		-0.012 ± 0.006	0.05454
	116	rs117627866	C	0.07116	Intron	1.18 (1.00-1.38)	0.04697		-0.292 ± 0.181	0.1069		-0.013 ± 0.040	0.7429		0.0031 ± 0.00141	0.02923		0.014 ± 0.012	0.2369
	117	rs227368	C	0.4639	Missense	0.92 (0.84-1.00)	0.05358		0.353 ± 0.094	1.64 × 10-4		-0.031 ± 0.021	0.1385		-0.0028 ± 0.00073	1.56 × 10-4		-0.0100 ± 0.0061	0.1039
	118	rs201903300	G	0.4637	Intron	0.92 (0.84-1.00)	0.05392		0.355 ± 0.094	1.50 × 10-4		-0.031 ± 0.021	0.1319		-0.0028 ± 0.00073	1.46 × 10-4		-0.0099 ± 0.0061	0.1061
	119	rs12650217	C	0.4637	Intron	0.92 (0.84-1.00)	0.05392		0.355 ± 0.094	1.50 × 10-4		-0.031 ± 0.021	0.1319		-0.0028 ± 0.00073	1.46 × 10-4		-0.0099 ± 0.0061	0.1061
	120	rs223495	G	0.2463	Intron	0.91 (0.84-1.00)	0.05735		0.557 ± 0.109	1.09 × 10-7		-0.048 ± 0.024	0.04825		-0.0042 ± 0.00085	5.93 × 10-7		-0.0139 ± 0.0071	0.04943
	121	rs227375	T	0.463	Intron	0.92 (0.84-1.00)	0.05749		0.354 ± 0.094	1.55 × 10-4		-0.031 ± 0.021	0.1343		-0.0028 ± 0.00073	1.49 × 10-4		-0.0102 ± 0.0061	0.09513
	122	rs12502761	C	0.09272	Intron	0.86 (0.74-1.01)	0.06255		0.366 ± 0.160	0.02238		-0.018 ± 0.036	0.6128		-0.0030 ± 0.00125	0.01755		-0.0106 ± 0.011	0.312
	123	rs77985169	C	0.1041	Intron	0.87 (0.75-1.01)	0.06396		0.257 ± 0.152	0.09153		0.005 ± 0.034	0.8855		-0.0020 ± 0.00119	0.09555		-0.0063 ± 0.0100	0.5257
	124	rs223496	G	0.2477	Intron	0.91 (0.82-1.01)	0.06954		0.566 ± 0.108	1.73 × 10-7		-0.047 ± 0.024	0.05402		-0.0041 ± 0.00084	1.09 × 10-6		-0.0140 ± 0.0071	0.04796
	125	rs223493	G	0.2435	Intron	0.91 (0.82-1.01)	0.07419		0.608 ± 0.109	2.42 × 10-8		-0.050 ± 0.024	0.04168		-0.0044 ± 0.00085	2.38 × 10-7		-0.0146 ± 0.0071	0.04094
	126	rs78905355	C	0.01218	Intron	0.69 (0.46-1.05)	0.08366		1.586 ± 0.423	1.80 × 10-4		-0.105 ± 0.094	0.2677		-0.0123 ± 0.00330	1.92 × 10-4		-0.0220 ± 0.0277	0.4273
	127	rs223494	T	0.2429	Intron	0.91 (0.82-1.01)	0.08529		0.616 ± 0.109	1.64 × 10-8		-0.052 ± 0.024	0.03179		-0.0044 ± 0.00085	1.88 × 10-7		-0.0148 ± 0.0071	0.03797
	128	rs200610521	C	0.02144	Intron	0.75 (0.53-1.06)	0.09935		-0.141 ± 0.322	0.6605		0.050 ± 0.072	0.49		0.0011 ± 0.00251	0.6688		-0.0198 ± 0.0210	0.3465
	129	rs11454438	CA	0.4807	Intron	1.08 (0.99-1.17)	0.1018		-0.400 ± 0.094	1.92 × 10-5		0.014 ± 0.021	0.4988		0.0029 ± 0.00073	6.02 × 10-5		0.0123 ± 0.0061	0.04417
	130	rs223499	G	0.247	Intron	0.92 (0.83-1.02)	0.1101		0.546 ± 0.108	4.82 × 10-7		-0.042 ± 0.024	0.08473		-0.0039 ± 0.00084	5.12 × 10-6		-0.0133 ± 0.0071	0.05988
	131	rs184475987	C	0.01156	Intron	1.32 (0.93-1.88)	0.1192		0.276 ± 0.438	0.5286		0.257 ± 0.098	8.46 × 10-3		0.0011 ± 0.00342	0.7547		0.0123 ± 0.0286	0.6682
	132	rs12501044	G	0.216	Intron	0.92 (0.82-1.02)	0.1275		-0.009 ± 0.113	0.9333		0.024 ± 0.025	0.3409		-0.0005 ± 0.00088	0.5484		-0.0095 ± 0.0074	0.201
	133	rs223501	A	0.2446	Intron	0.93 (0.84-1.03)	0.1355		0.485 ± 0.109	8.03 × 10-6		-0.038 ± 0.024	0.1198		-0.0033 ± 0.00085	8.79 × 10-5		-0.0109 ± 0.0070	0.1737
	134	rs223502	C	0.2455	Intron	0.93 (0.84-1.03)	0.1381		0.482 ± 0.109	8.95 × 10-6		-0.037 ± 0.024	0.131		-0.0033 ± 0.00085	1.03 × 10-4		-0.0101 ± 0.0071	0.1533
	135	rs78316355	T	0.01798	Intron	0.76 (0.52-1.10)	0.1394		0.308 ± 0.351	0.3814		-0.0009 ± 0.078	0.9907		-0.0028 ± 0.00274	0.2982		-0.0025 ± 0.0230	0.9147
	136	rs223500	T	0.2476	Intron	0.93 (0.84-1.03)	0.1626		0.543 ± 0.108	5.31 × 10-7		-0.045 ± 0.024	0.05973		-0.0038 ± 0.00084	5.92 × 10-6		-0.0136 ± 0.0071	0.05509
	137	rs79039583	A	0.0719	Intron	0.88 (0.74-1.05)	0.1643		0.214 ± 0.181	0.2354		0.023 ± 0.040	0.5661		-0.0014 ± 0.00141	0.3164		-0.0045 ± 0.0118	0.7043
	138	rs393223	G	0.2643	Intron	0.93 (0.85-1.03)	0.18		0.481 ± 0.106	5.96 × 10-6		-0.043 ± 0.024	0.07161		-0.0033 ± 0.00083	7.03 × 10-5		-0.0097 ± 0.0069	0.1605
	139	rs227280	A	0.2644	Intron	0.93 (0.85-1.03)	0.1837		0.486 ± 0.106	4.79 × 10-6		-0.044 ± 0.024	0.0661		-0.0033 ± 0.00083	6.00 × 10-5		-0.0100 ± 0.0069	0.1505
	140	rs223503	G	0.2466	Intron	0.93 (0.84-1.03)	0.1853		0.477 ± 0.108	1.08 × 10-5		-0.037 ± 0.024	0.127		-0.0032 ± 0.00084	1.36 × 10-4		-0.0099 ± 0.0071	0.1638
	141	rs12513074	A	0.2065	Intron	0.93 (0.83-1.04)	0.1877		0.016 ± 0.115	0.8912		-0.005 ± 0.026	0.8325		-0.0006 ± 0.00090	0.5222		-0.0024 ± 0.0075	0.7468
	142	rs76954465	G	0.04145	Intron	1.15 (0.93-1.41)	0.1938		-0.290 ± 0.235	0.217		0.066 ± 0.052	0.2042		0.0022 ± 0.00183	0.2329		0.0206 ± 0.0153	0.1781
	143	rs227284	G	0.2612	Intron	0.94 (0.85-1.04)	0.2124		0.485 ± 0.107	5.44 × 10-6		-0.043 ± 0.024	0.07364		-0.0033 ± 0.00083	6.17 × 10-5		-0.0109 ± 0.0070	0.1196
	144	rs170563*	C	0.2613	Intron	0.94 (0.85-1.04)	0.2128		0.480 ± 0.107	6.92 × 10-6		-0.043 ± 0.024	0.06758		-0.0033 ± 0.00083	7.33 × 10-5		-0.0110 ± 0.0070	0.116
	145	rs227281	C	0.2611	Intron	0.94 (0.85-1.04)	0.2159		0.484 ± 0.107	5.68 × 10-6		-0.043 ± 0.024	0.06958		-0.0033 ± 0.00083	6.36 × 10-5		-0.0108 ± 0.0070	0.1229
	146	rs227283	C	0.2611	Intron	0.94 (0.85-1.04)	0.2165		0.486 ± 0.107	5.29 × 10-6		-0.043 ± 0.024	0.06982		-0.0033 ± 0.00083	6.45 × 10-5		-0.0110 ± 0.0070	0.1156
	147	rs227282	C	0.2611	Intron	0.94 (0.85-1.04)	0.2169		0.484 ± 0.107	5.78 × 10-6		-0.043 ± 0.024	0.0688		-0.0033 ± 0.00083	6.51 × 10-5		-0.0109 ± 0.0070	0.118
	148	rs145830946	G	0.01918	Intron	1.21 (0.89-1.63)	0.2273		-0.550 ± 0.339	0.1049		0.030 ± 0.076	0.694		0.0043 ± 0.00264	0.1018		0.0106 ± 0.0221	0.6318
	149	rs79938187	C	0.01603	Intron	0.79 (0.54-1.16)	0.2276		0.205 ± 0.372	0.5813		0.037 ± 0.083	0.6575		-0.0018 ± 0.00290	0.5367		0.0136 ± 0.0243	0.5759
	150	rs376933388	A	0.01294	Intron	1.23 (0.88-1.74)	0.2297		0.505 ± 0.416	0.2255		-0.234 ± 0.093	0.01184		-0.0033 ± 0.00325	0.3134		0.0168 ± 0.0272	0.5364
	151	rs371555308	C	0.01295	Intron	1.23 (0.87-1.74)	0.2345		0.505 ± 0.416	0.2246		-0.237 ± 0.093	0.01068		-0.0033 ± 0.00325	0.3103		0.0171 ± 0.0272	0.5293
	152	rs227378	C	0.2606	Intron	0.94 (0.85-1.04)	0.2404		0.480 ± 0.107	6.95 × 10-6		-0.040 ± 0.024	0.08899		-0.0033 ± 0.00083	6.13 × 10-5		-0.0109 ± 0.0070	0.1172
	153	rs11728959	T	0.03525	Intron	0.86 (0.67-1.11)	0.2431		0.370 ± 0.253	0.1439		0.009 ± 0.056	0.8742		-0.0030 ± 0.00197	0.1229		-0.0309 ± 0.0165	0.06178
	154	rs78170878	T	0.03658	Intron	1.14 (0.91-1.42)	0.2442		-0.075 ± 0.249	0.7624		0.053 ± 0.055	0.3344		0.0012 ± 0.00194	0.5468		-0.0113 ± 0.0163	0.4862
	155	rs78253661	T	0.06114	Intron	0.90 (0.74-1.08)	0.2483		0.355 ± 0.195	0.06813		-0.0007 ± 0.043	0.9872		-0.0027 ± 0.00152	0.07507		-0.0132 ± 0.0127	0.2999
	156	rs141931379	T	0.03607	Intron	0.87 (0.68-1.11)	0.2539		0.460 ± 0.250	0.066		0.025 ± 0.056	0.6518		-0.0036 ± 0.00195	0.0621		-0.0314 ± 0.0164	0.05516
	157	rs79509154	G	0.01034	Intron	1.22 (0.83-1.80)	0.3069		-0.204 ± 0.463	0.6601		-0.021 ± 0.103	0.8381		0.0010 ± 0.00361	0.7755		0.0137 ± 0.0303	0.6519
	158	rs148753435	C	0.02711	Intron	0.86 (0.65-1.15)	0.3152		0.446 ± 0.288	0.1213		0.048 ± 0.064	0.4513		-0.0037 ± 0.00224	0.1001		-0.0264 ± 0.0188	0.1607
	159	rs227363	C	0.2572	Intron	0.95 (0.86-1.05)	0.3195		0.461 ± 0.107	1.66 × 10-5		-0.037 ± 0.024	0.1233		-0.0032 ± 0.00084	1.39 × 10-4		-0.0109 ± 0.0070	0.1189
	160	rs13112128	T	0.2571	Intron	0.95 (0.86-1.05)	0.3201		0.468 ± 0.107	1.26 × 10-5		-0.037 ± 0.024	0.1259		-0.0032 ± 0.00084	1.06 × 10-4		-0.0109 ± 0.0070	0.1197
	161	rs150900	C	0.2572	Intron	0.95 (0.86-1.05)	0.3201		0.462 ± 0.107	1.61 × 10-5		-0.036 ± 0.024	0.1269		-0.0032 ± 0.00083	1.34 × 10-4		-0.0109 ± 0.0070	0.12
	162	rs227369	G	0.2572	Intron	0.95 (0.86-1.05)	0.3205		0.459 ± 0.107	1.86 × 10-5		-0.037 ± 0.024	0.1182		-0.0032 ± 0.00083	1.52 × 10-4		-0.0108 ± 0.0070	0.1225
	163	rs227374	A	0.2572	Intron	0.95 (0.86-1.05)	0.3205		0.459 ± 0.107	1.86 × 10-5		-0.037 ± 0.024	0.1182		-0.0032 ± 0.00083	1.52 × 10-4		-0.0108 ± 0.0070	0.1225
	164	rs227372	T	0.2572	Intron	0.95 (0.86-1.05)	0.3213		0.459 ± 0.107	1.82 × 10-5		-0.038 ± 0.024	0.1161		-0.0032 ± 0.00083	1.52 × 10-4		-0.0109 ± 0.0070	0.1187
	165	rs227371	G	0.2572	Intron	0.95 (0.86-1.05)	0.3214		0.458 ± 0.107	1.92 × 10-5		-0.037 ± 0.024	0.12		-0.0032 ± 0.00084	1.57 × 10-4		-0.0108 ± 0.0070	0.1222
	166	rs227365	A	0.2572	Intron	0.95 (0.86-1.05)	0.3215		0.459 ± 0.107	1.84 × 10-5		-0.037 ± 0.024	0.1232		-0.0032 ± 0.00084	1.53 × 10-4		-0.0107 ± 0.0070	0.1251
	167	rs227370	T	0.2572	Intron	0.95 (0.86-1.05)	0.3218		0.458 ± 0.107	1.89 × 10-5		-0.038 ± 0.024	0.1164		-0.0031 ± 0.00084	1.67 × 10-4		-0.0110 ± 0.0070	0.1158
	168	rs170564	C	0.2575	Intron	0.95 (0.86-1.05)	0.322		0.470 ± 0.107	1.15 × 10-5		-0.038 ± 0.024	0.1145		-0.0032 ± 0.00083	9.90 × 10-5		-0.0110 ± 0.0070	0.1168
	169	rs227285	C	0.2575	Intron	0.95 (0.86-1.05)	0.3224		0.468 ± 0.107	1.24 × 10-5		-0.037 ± 0.024	0.118		-0.0032 ± 0.00083	1.08 × 10-4		-0.0111 ± 0.0070	0.1139
	170	rs227364	T	0.2572	Intron	0.95 (0.86-1.05)	0.324		0.459 ± 0.107	1.84 × 10-5		-0.037 ± 0.024	0.121		-0.0032 ± 0.00084	1.55 × 10-4		-0.0110 ± 0.0070	0.1173
	171	rs191556243	T	0.01009	Intron	0.80 (0.51-1.25)	0.324		1.319 ± 0.465	4.57 × 10-3		-0.102 ± 0.104	0.325		-0.0089 ± 0.00362	0.01399		-0.0296 ± 0.0304	0.3297
	172	rs227376	C	0.2571	Intron	0.95 (0.86-1.05)	0.3246		0.459 ± 0.107	1.79 × 10-5		-0.037 ± 0.024	0.1245		-0.0032 ± 0.00084	1.50 × 10-4		-0.0109 ± 0.0070	0.1183
	173	rs227293	C	0.2571	Intron	0.95 (0.86-1.05)	0.3246		0.459 ± 0.107	1.79 × 10-5		-0.037 ± 0.024	0.1245		-0.0032 ± 0.00084	1.50 × 10-4		-0.0109 ± 0.0070	0.1183
	174	rs227373	A	0.2576	Intron	0.95 (0.86-1.05)	0.3294		0.460 ± 0.107	1.73 × 10-5		-0.037 ± 0.024	0.1209		-0.0032 ± 0.00083	1.59 × 10-4		-0.0113 ± 0.0070	0.1058
	175	rs117481582	G	0.02373	Intron	0.86 (0.64-1.16)	0.3313		0.609 ± 0.306	0.04659		0.038 ± 0.068	0.5751		-0.0048 ± 0.00239	0.04403		-0.0165 ± 0.0200	0.4096
	176	rs227298	T	0.2603	Intron	0.95 (0.86-1.05)	0.3334		0.446 ± 0.107	2.97 × 10-5		-0.035 ± 0.024	0.1433		-0.0031 ± 0.00083	2.19 × 10-4		-0.0104 ± 0.0070	0.1345
	177	rs227291	G	0.2574	Intron	0.95 (0.86-1.05)	0.3345		0.459 ± 0.107	1.79 × 10-5		-0.036 ± 0.024	0.133		-0.0032 ± 0.00083	1.45 × 10-4		-0.0106 ± 0.0070	0.1289
	178	rs223513	T	0.2574	Intron	0.95 (0.86-1.05)	0.3345		0.459 ± 0.107	1.79 × 10-5		-0.036 ± 0.024	0.133		-0.0032 ± 0.00083	1.45 × 10-4		-0.0106 ± 0.0070	0.1289
	179	rs223512	C	0.2574	Intron	0.95 (0.86-1.05)	0.3345		0.459 ± 0.107	1.79 × 10-5		-0.036 ± 0.024	0.133		-0.0032 ± 0.00083	1.45 × 10-4		-0.0106 ± 0.0070	0.1289
	180	rs227377	C	0.2574	Intron	0.95 (0.86-1.05)	0.3346		0.460 ± 0.107	1.77 × 10-5		-0.036 ± 0.024	0.1351		-0.0032 ± 0.00083	1.44 × 10-4		-0.0107 ± 0.0070	0.1279
	181	rs223510	C	0.2574	Intron	0.95 (0.86-1.05)	0.335		0.459 ± 0.107	1.79 × 10-5		-0.036 ± 0.024	0.1306		-0.0032 ± 0.00083	1.46 × 10-4		-0.0107 ± 0.0070	0.1276
	182	rs227367	A	0.2574	Intron	0.95 (0.86-1.05)	0.3351		0.456 ± 0.107	2.03 × 10-5		-0.037 ± 0.024	0.126		-0.0031 ± 0.00083	1.64 × 10-4		-0.0106 ± 0.0070	0.1306
	183	rs223511	G	0.2573	Intron	0.95 (0.86-1.05)	0.3384		0.457 ± 0.107	1.96 × 10-5		-0.036 ± 0.024	0.1294		-0.0032 ± 0.00083	1.59 × 10-4		-0.0106 ± 0.0070	0.131
	184	rs148150924	T	0.04029	Intron	1.11 (0.90-1.38)	0.3407		-0.547 ± 0.238	0.02146		-0.009 ± 0.053	0.8614		0.0035 ± 0.00186	0.05906		0.0106 ± 0.0155	0.4939
	185	rs227366	G	0.2583	Intron	0.95 (0.86-1.05)	0.342		0.457 ± 0.107	1.91 × 10-5		-0.037 ± 0.024	0.119		-0.0031 ± 0.00083	1.61 × 10-4		-0.0112 ± 0.0070	0.1087
	186	rs188704207	C	0.01753	Intron	1.16 (0.85-1.59)	0.3494		-0.239 ± 0.353	0.4995		0.091 ± 0.079	0.2481		0.0019 ± 0.00276	0.4842		0.0124 ± 0.0231	0.5911
	187	rs138196370	G	0.01372	Intron	0.83 (0.55-1.06)	0.3559		0.018 ± 0.401	0.9647		-0.073 ± 0.090	0.4119		-0.0017 ± 0.00313	0.5929		-0.0469 ± 0.0263	0.07421
	188	rs223507	A	0.2566	Intron	0.95 (0.86-1.06)	0.3572		0.455 ± 0.107	2.15 × 10-5		-0.036 ± 0.024	0.1324		-0.0031 ± 0.00084	1.94 × 10-4		-0.0109 ± 0.0070	0.121
	189	rs223505	T	0.2565	Intron	0.95 (0.86-1.06)	0.3596		0.454 ± 0.107	2.31 × 10-5		-0.036 ± 0.024	0.1351		-0.0031 ± 0.00084	2.21 × 10-4		-0.0110 ± 0.0070	0.1164
	190	rs138016189	A	0.02192	Intron	0.87 (0.64-1.18)	0.3659		0.341 ± 0.317	0.283		-0.043 ± 0.071	0.5449		-0.0031 ± 0.00247	0.2175		0.0062 ± 0.0207	0.7665
	191	rs223508	T	0.2557	Intron	0.96 (0.86-1.06)	0.3699		0.472 ± 0.107	1.11 × 10-5		-0.041 ± 0.024	0.08468		-0.0032 ± 0.00084	1.06 × 10-4		-0.0110 ± 0.0070	0.1183
	192	rs767375211	A	0.03351	Intron	0.89 (0.70-1.15)	0.3836		0.300 ± 0.259	0.2466		-0.007 ± 0.058	0.8994		-0.0024 ± 0.00202	0.2298		-0.0316 ± 0.0169	0.06183
	193	rs227288	G	0.2744	Intron	0.96 (0.87-1.06)	0.3847		0.406 ± 0.105	1.10 × 10-4		-0.037 ± 0.023	0.1166		-0.0029 ± 0.00082	4.08 × 10-4		-0.0071 ± 0.0069	0.3022
	194	rs223504	C	0.2569	Intron	0.96 (0.87-1.06)	0.3882		0.450 ± 0.107	2.62 × 10-5		-0.033 ± 0.024	0.1624		-0.0031 ± 0.00084	2.23 × 10-4		-0.0105 ± 0.0070	0.1348
	195	rs223506	C	0.2568	Intron	0.96 (0.87-1.06)	0.3903		0.454 ± 0.107	2.24 × 10-5		-0.035 ± 0.024	0.1426		-0.0031 ± 0.00084	1.95 × 10-4		-0.0106 ± 0.0070	0.129
	196	rs17033100	T	0.03138	Intron	1.11 (0.87-1.41)	0.3903		-0.739 ± 0.268	5.88 × 10-3		-0.027 ± 0.060	0.6469		0.0047 ± 0.00209	0.02599		0.0084 ± 0.0175	0.6327
	197	rs227289	A	0.2758	Intron	0.96 (0.87-1.06)	0.4073		0.401 ± 0.105	1.34 × 10-4		-0.034 ± 0.023	0.141		-0.0028 ± 0.00082	5.03 × 10-4		-0.0073 ± 0.0069	0.2861
	198	rs116567127	T	0.05193	Intron	1.08 (0.90-1.31)	0.4073		-0.160 ± 0.211	0.4478		0.038 ± 0.047	0.425		0.0011 ± 0.00164	0.5005		0.0164 ± 0.0138	0.2353
	199	rs10004772	A	0.3339	Intron	1.04 (0.95-1.14)	0.4089		-0.299 ± 0.099	2.51 × 10-3		0.025 ± 0.022	0.2587		0.0021 ± 0.00077	6.13 × 10-3		0.0075 ± 0.0065	0.2469
	200	rs117368394	A	0.01901	Intron	1.13 (0.84-1.53)	0.4297		-0.027 ± 0.343	0.9366		0.118 ± 0.076	0.1238		-0.0006 ± 0.00267	0.8206		0.0289 ± 0.0224	0.1966
	201	rs77795718	A	0.04058	Intron	0.91 (0.73-1.15)	0.4342		-0.369 ± 0.237	0.1186		0.020 ± 0.053	0.7021		0.0020 ± 0.00184	0.2837		-0.0010 ± 0.0155	0.9466
	202	rs142956827	T	0.01478	Intron	1.13 (0.81-1.59)	0.4681		0.496 ± 0.391	0.2042		-0.247 ± 0.087	4.68 × 10-3		-0.0041 ± 0.00305	0.1791		0.0175 ± 0.0255	0.494
	203	rs189023845	C	0.0184	Intron	1.12 (0.82-1.53)	0.4805		-0.289 ± 0.345	0.4025		0.087 ± 0.077	0.2557		0.0020 ± 0.00269	0.4671		0.0065 ± 0.0226	0.7732
	204	rs116895838	G	0.01721	Intron	0.89 (0.63-1.25)	0.4909		0.322 ± 0.358	0.369		0.017 ± 0.080	0.8295		-0.0028 ± 0.00279	0.3109		-0.0195 ± 0.0234	0.4033
	205	rs75552082	T	0.02944	Intron	0.91 (0.71-1.18)	0.493		0.211 ± 0.275	0.4433		-0.091 ± 0.061	0.1365		-0.0025 ± 0.00215	0.2383		-0.0250 ± 0.0180	0.1648
	206	rs116947538	T	0.03768	Intron	0.93 (0.73-1.17)	0.5171		0.148 ± 0.245	0.5451		-0.010 ± 0.055	0.8618		-0.0007 ± 0.00191	0.699		-0.0060 ± 0.0160	0.7094
	207	rs190428954	C	0.01045	Intron	1.13 (0.77-1.67)	0.5316		0.410 ± 0.459	0.3712		-0.164 ± 0.102	0.1088		-0.0044 ± 0.00358	0.2245		-0.0436 ± 0.0300	0.1467
	208	rs74819220	C	0.06012	Intron	0.94 (0.78-1.13)	0.533		0.349 ± 0.196	0.0748		-0.031 ± 0.044	0.4792		-0.0028 ± 0.00153	0.06477		-0.0182 ± 0.0128	0.1561
	209	rs141385611	A	0.01371	Intron	1.10 (0.77-1.56)	0.605		0.806 ± 0.402	0.04484		-0.013 ± 0.090	0.884		-0.0051 ± 0.00313	0.106		0.0196 ± 0.0262	0.4563
	210	rs190394352	T	0.05112	Intron	1.05 (0.86-1.28)	0.6113		0.364 ± 0.213	0.08675		-0.054 ± 0.047	0.2534		-0.0026 ± 0.00166	0.1155		0.0040 ± 0.0139	0.7708
	211	rs143861038	T	0.01663	Intron	0.92 (0.64-1.30)	0.6197		1.034 ± 0.364	4.51 × 10-3		-0.023 ± 0.081	0.7748		-0.0071 ± 0.00284	0.01211		-0.0050 ± 0.0238	0.8324
	212	rs6829157	A	0.01652	Intron	0.92 (0.65-1.30)	0.6336		1.096 ± 0.365	2.70 × 10-3		-0.038 ± 0.082	0.6412		-0.0076 ± 0.00285	7.94 × 10-3		-0.0091 ± 0.0239	0.7026
	213	rs118026118	C	0.01877	Intron	1.07 (0.78-1.46)	0.6814		0.202 ± 0.345	0.558		0.022 ± 0.077	0.7785		-0.0019 ± 0.00269	0.4797		0.0093 ± 0.0225	0.6802
	214	rs139370250	T	0.01108	Intron	0.93 (0.62-1.40)	0.7208		-0.439 ± 0.443	0.3215		0.013 ± 0.099	0.2007		0.0030 ± 0.00345	0.3858		-0.0605 ± 0.0289	0.0367
	215	rs61213019	A	0.1199	Intron	1.02 (0.90-1.17)	0.7272		-0.402 ± 0.144	5.18 × 10-3		0.0002 ± 0.032	0.9953		0.0028 ± 0.00112	0.01203		0.0223 ± 0.0094	0.01753
	216	rs3774969	C	0.05304	Intron	1.03 (0.85-1.24)	0.7511		-0.077 ± 0.208	0.71		0.016 ± 0.046	0.7342		0.0060 ± 0.00162	0.7135		0.0070 ± 0.0136	0.6044
	217	rs77784769	T	0.03694	Intron	1.03 (0.82-1.30)	0.7721		0.070 ± 0.248	0.7763		-0.018 ± 0.055	0.7399		-0.0002 ± 0.00193	0.8998		-0.0063 ± 0.0162	0.6987
	218	rs2293995	C	0.05897	Intron	0.97 (0.81-1.17)	0.7795		0.328 ± 0.198	0.097		-0.027 ± 0.044	0.541		-0.0025 ± 0.00154	0.1074		-0.0147 ± 0.0129	0.2553
	219	rs147542465	T	0.05497	Intron	0.97 (0.80-1.18)	0.7902		0.378 ± 0.206	0.06569		-0.041 ± 0.046	0.3735		-0.0023 ± 0.00160	0.1599		-0.0052 ± 0.0134	0.7
	220	rs57694153	T	0.01301	Intron	0.96 (0.64-1.43)	0.8231		-0.581 ± 0.411	0.157		-0.031 ± 0.092	0.7384		0.0037 ± 0.00320	0.243		0.0051 ± 0.0268	0.8483
	221	rs140871512	A	0.02196	Intron	0.97 (0.71-1.32)	0.8381		-0.439 ± 0.319	0.1689		0.030 ± 0.071	0.6761		0.0023 ± 0.00249	0.3579		0.0179 ± 0.0209	0.3898
	222	rs60748029	A	0.01205	Intron	1.04 (0.69-1.55)	0.8634		-0.413 ± 0.425	0.3313		0.014 ± 0.095	0.8825		0.0028 ± 0.00331	0.4009		-0.0066 ± 0.0277	0.8121
	223	rs80121243	G	0.2469	Intron	0.99 (0.90-1.10)	0.8686		-0.269 ± 0.108	0.01305		0.038 ± 0.024	0.1172		0.0017 ± 0.00085	0.04746		0.0091 ± 0.0071	0.201
	224	rs117492413	A	0.01017	Intron	1.03 (0.67-1.60)	0.8801		-0.406 ± 0.463	0.3806		0.236 ± 0.103	0.02213		0.0024 ± 0.00361	0.5021		0.0185 ± 0.0302	0.5392
	225	rs141271022	C	0.02029	Intron	1.02 (0.75-1.39)	0.9		-0.186 ± 0.332	0.5763		0.060 ± 0.074	0.4173		0.0015 ± 0.00259	0.555		0.0339 ± 0.0217	0.1187
	226	rs7672268	T	0.05256	Intron	1.01 (0.83-1.22)	0.923		-0.090 ± 0.209	0.6669		0.013 ± 0.047	0.7859		0.0064 ± 0.00163	0.6925		0.0054 ± 0.0137	0.6943
	227	rs117797211	A	0.04568	Intron	1.01 (0.82-1.24)	0.9265		0.026 ± 0.224	0.9073		0.035 ± 0.050	0.4855		0.0003 ± 0.00175	0.8627		-0.0031 ± 0.0147	0.8331
	228	rs76323566	A	0.04289	Intron	0.99 (0.80-1.23)	0.9592		-0.161 ± 0.230	0.4845		0.036 ± 0.051	0.4809		0.0011 ± 0.00179	0.5537		-0.0002 ± 0.0150	0.9896
	229	rs75642702	A	0.02557	Intron	1.00 (0.76-1.31)	0.9895		-0.034 ± 0.293	0.907		-0.029 ± 0.065	0.6534		0.0002 ± 0.00229	0.927		-0.0105 ± 0.0192	0.5852
	SNP, single nucleotide polymorphism; CHR, chromosome; MAF, minor allele frequency; CKD, chronic kidney disease; eGFR, estimated glomerular filtration rate; β, regression coefficient; S.E, standard error; OR, odds ratio; CI, confidence interval. eGFR, BUN, creatinine and uric acid used in the linear regression, were adjusted for age and gender. Odds ratios were calculated after adjusting for age a…
